# Supplementary material for: Potassium channel activity controls breast cancer metastasis by affecting β-catenin signaling
Source: PubMed Central journal article supplement (PMC6385342; doi:10.1038/s41419-019-1429-0), 2019-02-21

Supplementary Fig. 1

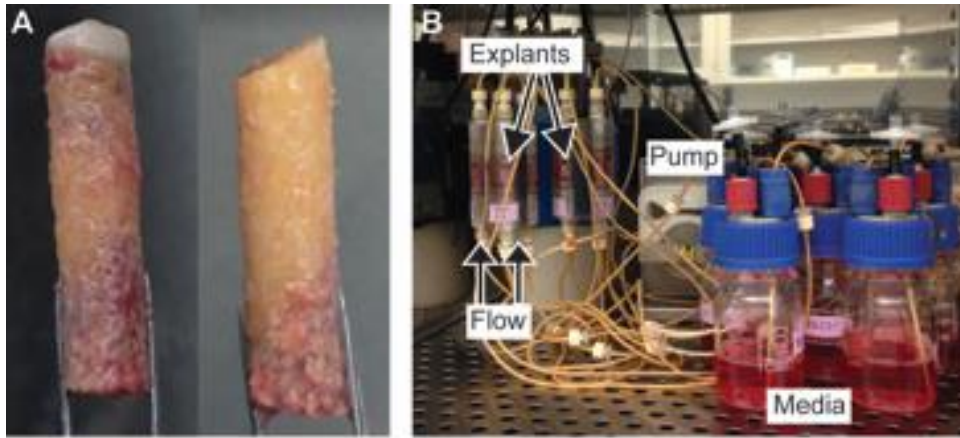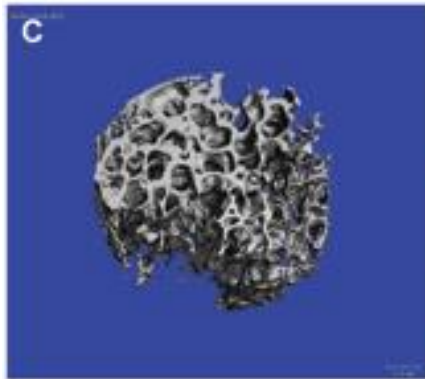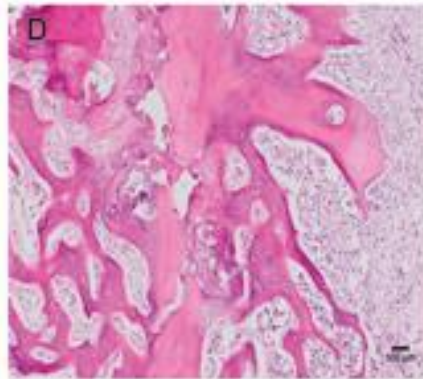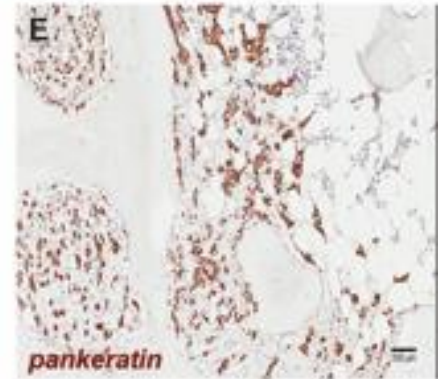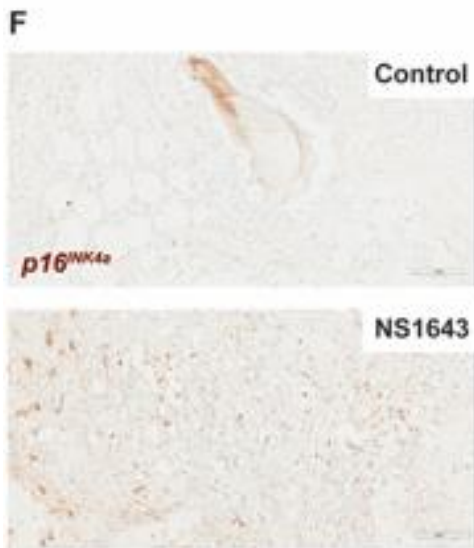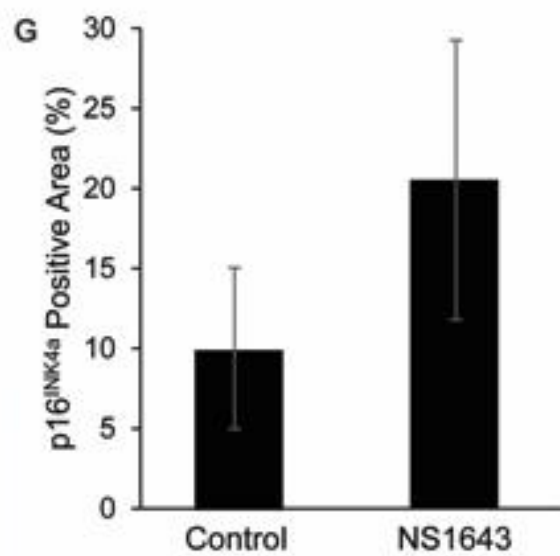

Supplement: 41419_2019_1429_MOESM1_ESM.pdf [file 41419_2019_1429_MOESM1_ESM.pdf]
